# Supplementary material
Source: Frontiers journal article supplement (https://www.frontiersin.org/articles/481391)
Supplement: Image_1.pdf [file Image_1.pdf]

**Figure S1:** Definition of the time line

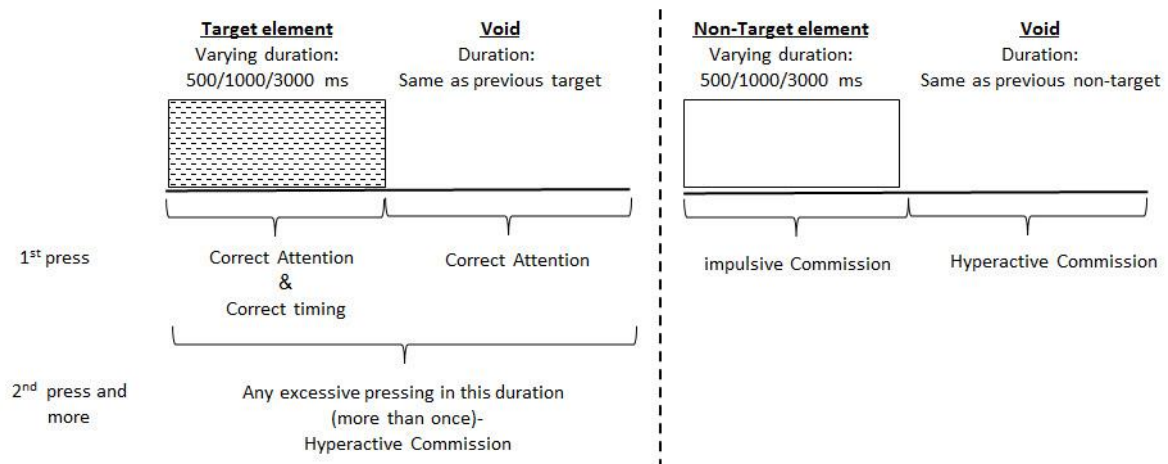

Figure S1 presents the MOXO-CPT task. Target and non-target stimuli were presented for 500, 1000 or 3000 ms in the children's version and 500, 1000 or 4000 ms in the adolescents' version. Each stimulus was followed by a void period of the same duration. The stimulus remained on the screen for the full duration regardless the response. Distracting stimuli were not synchronized with target/ non-target's onset and could be generated during target / non target stimulus or the void period.
