# Supplementary material
Source: Frontiers journal article supplement (https://www.frontiersin.org/articles/481391)
Supplement: Image_2.pdf [file Image_2.pdf]

**Figure S2:** Interaction effect of gender with ADHD symptom type

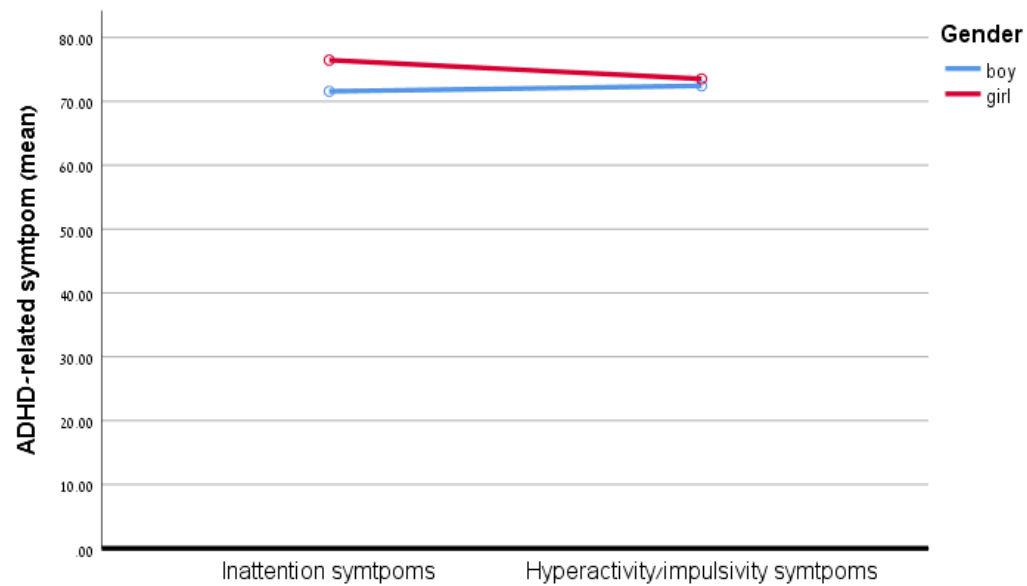

Figure S2 presents the interaction effect between gender and ADHD symptom type according to parents' and teachers' reports (Conners' ADHD rating scales). As can be seen, girls had more inattention problems than boys, but no gender difference was evident in the hyperactivity/ impulsivity symptoms
